# Supplementary material for: An Electrophysiological and Pharmacological Study of the Properties of Human iPSC-Derived Neurons for Drug Discovery
Source: MDPI journal article supplement (doi:10.3390/cells10081953), 2021-07-31
Supplement: s1 [file s1]

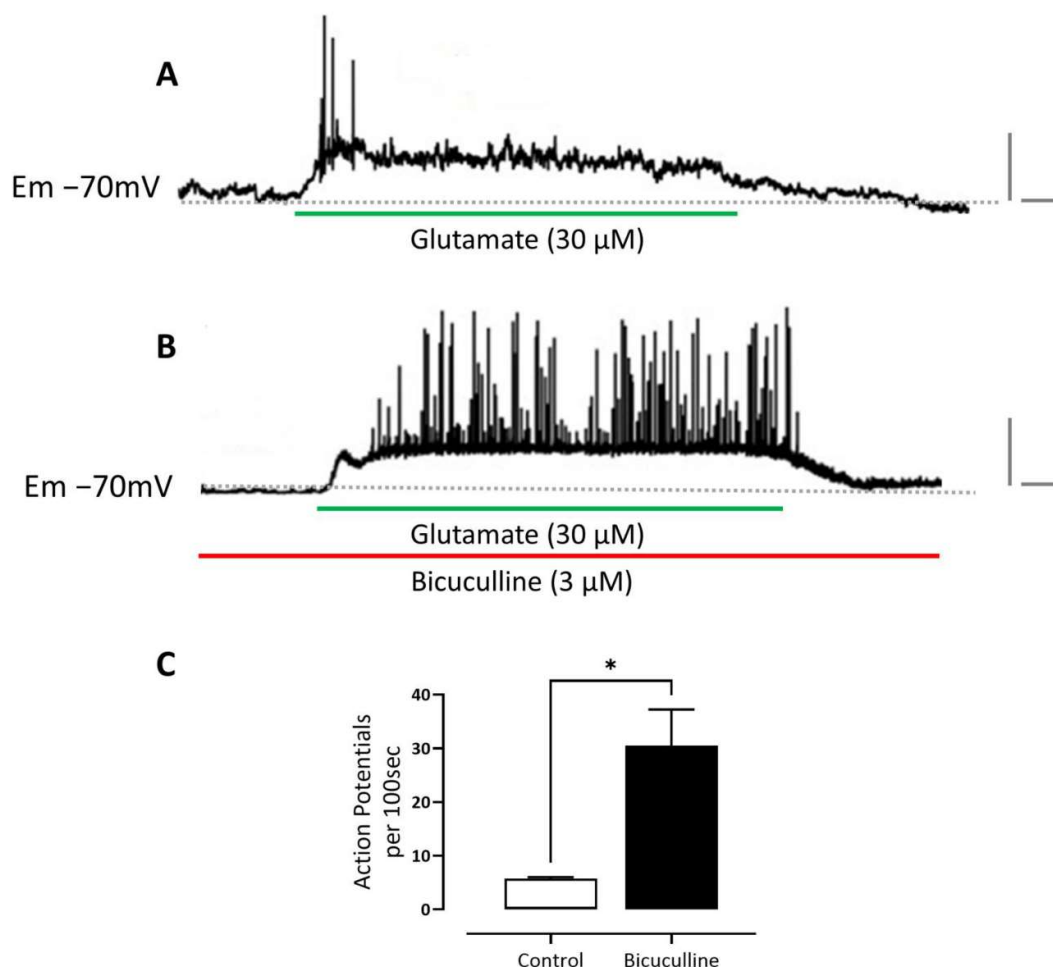

**Figure S1.** (A) A single *iCell* neuron held in current clamp at  $-70$  mV, transiently exposed to glutamate ( $30 \mu\text{M}$ ) depolarizes the cell and evokes 4–5 spikes. (B) A single *iCell* neuron with bicuculline ( $3 \mu\text{M}$ ) included in the bath solution transiently exposed to glutamate ( $30 \mu\text{M}$ ) evokes depolarization and a train of action potential throughout the membrane depolarization. (C) A histogram of the number of action potentials recorded over 100 s when cells are depolarized in the absence (control) or presence of bicuculline. As can be seen, bicuculline significantly ( $* p \leq 0.05$ ) increased the number of action potentials. The bars and lines represent the mean  $\pm$  sem of  $n = 4$ . The bath solution was  $\text{Mg}^{2+}$ -free; the internal solution was potassium gluconate-based. The time and voltage calibration bars = 25 s and 50 mV respectively. *iCells* were 9–10 weeks in vitro.
